# Supplementary material
Source: PubMed Central journal article supplement (PMC2938847)
Supplement: blood-2010-01-267112_1.pdf [file blood-2010-01-267112_1.pdf]

FigS1

Non-transgenic WT

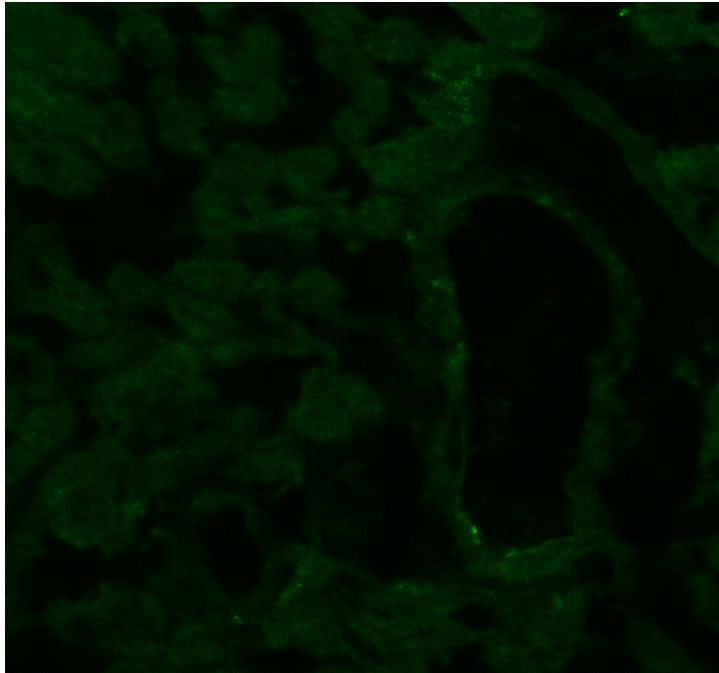

hCD59RBC

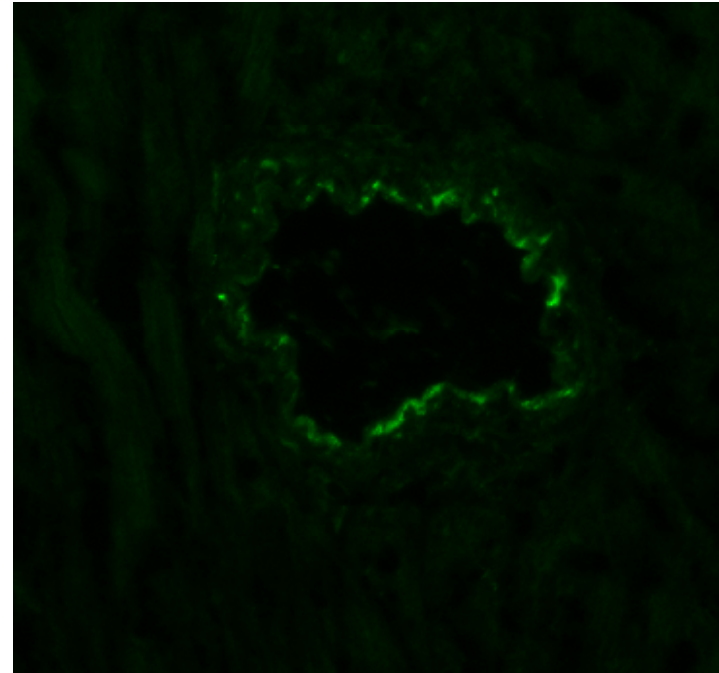

**FigS1: The hCD59 protein was detected in the endothelium of middle-sized intramyocardial vessels in ThCD59RBC but not in the non-transgenic mouse hearts.** Immunofluorescence was performed with anti-hCD59 antibody (Bric 229, BITS/IBGRL).

FigS2

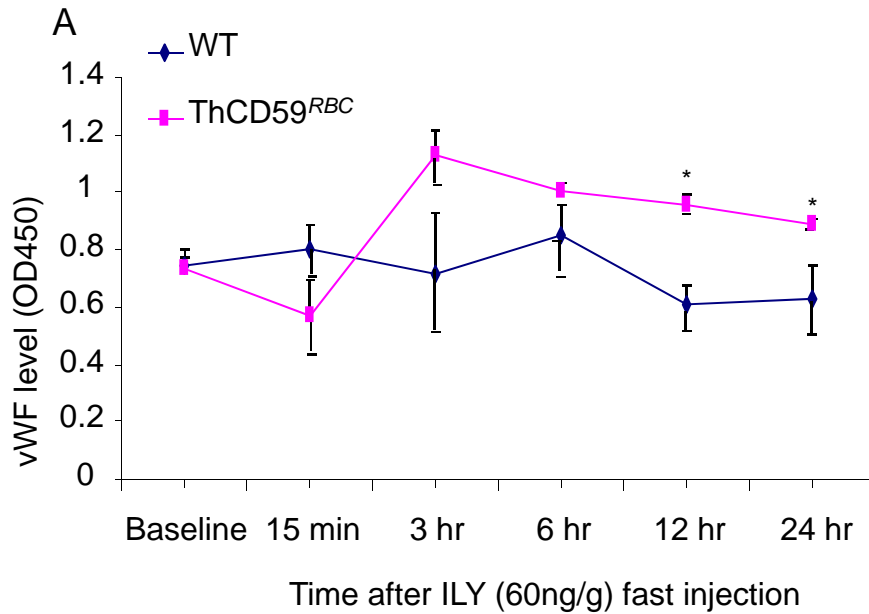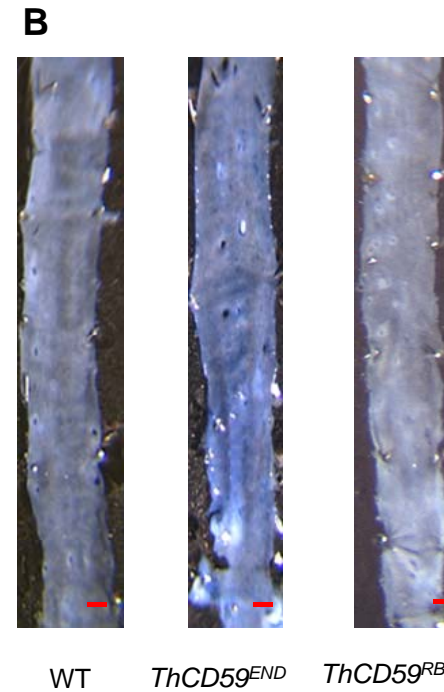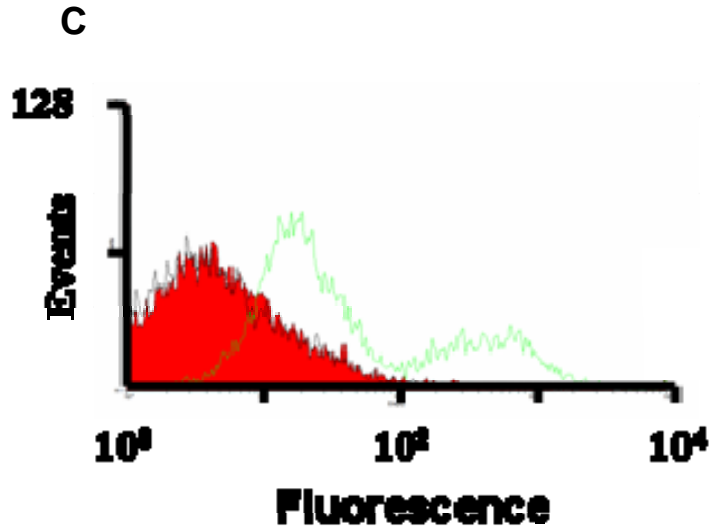

**FigS2: ILY injection did not result in direct endothelial cell damage:** **(A)** vWF levels after ILY injection in *ThCD59<sup>RBC</sup>* mice. Data are represented by Mean  $\pm$  SEM \* $P < 0.05$  vs WT mice (n=4) 12 and 24 hrs after ILY injection. **(B)** Representative pictures from 4 independent mice in each group show the Evan's blue staining in the aorta of the mice. The Evan's blue staining of the aortas from WT and *ThCD59<sup>RBC</sup>* mice treated with ILY<sub>140</sub>SI or *ThCD59<sup>END</sup>* mice treated with 4.5 ng/g ILY i.v. injection was performed at 2 hrs post-injection. Extensive Evan's blue staining was detected in the aorta of the *ThCD59<sup>END</sup>* that express hCD59 in the endothelium, but not in the WT and *ThCD59<sup>RBC</sup>* mice. Scale bar: 1 mm. **(C)** FACS analysis showed no hCD59 expression in the platelets of *ThCD59<sup>RBC</sup>* or WT platelets but in human platelets. Red: WT platelets; Green: human platelets; Black: *ThCD59<sup>RBC</sup>* platelets. The platelets were stained with anti-human CD59 Ab (Bric 229) and FITC-conjugated secondary Abs.

**FigS3**

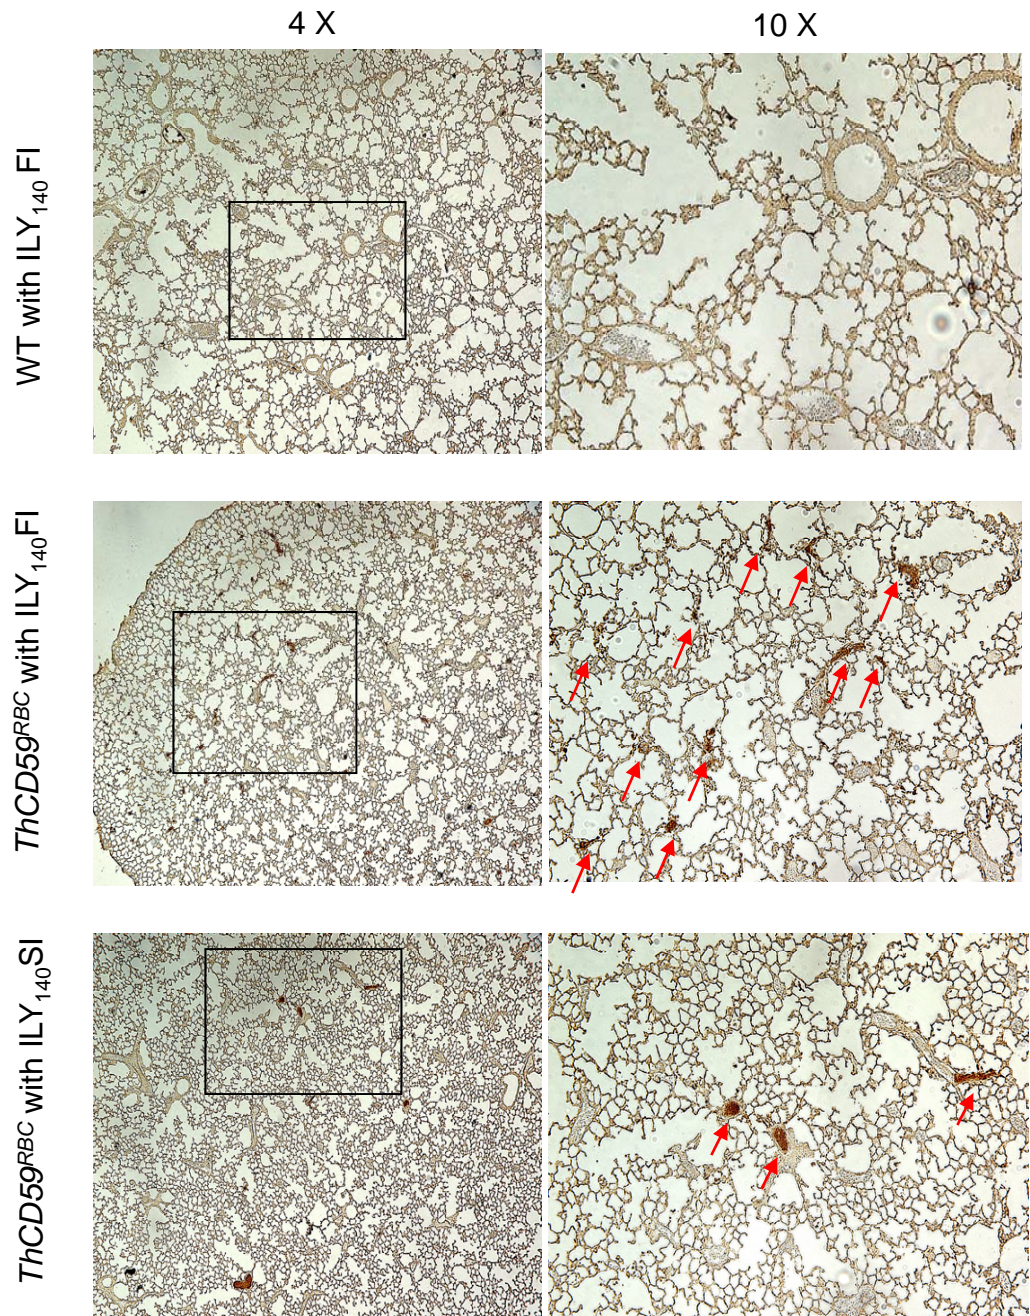

**FigS3: Representative images of P-selectin staining in lung.** There was more extensive P-selectin staining in the alveolar vessels in the *ThCD59<sup>RBC</sup>* with ILY<sub>140</sub>FI treatment than in the *ThCD59<sup>RBC</sup>* with ILY<sub>140</sub>SI treatment, or the WT with ILY<sub>140</sub>FI treatment. The 10 X magnification images show the area of 4 X magnification images highlighted in the black squares.

FigS4

Intergrin  $\alpha$ IIb

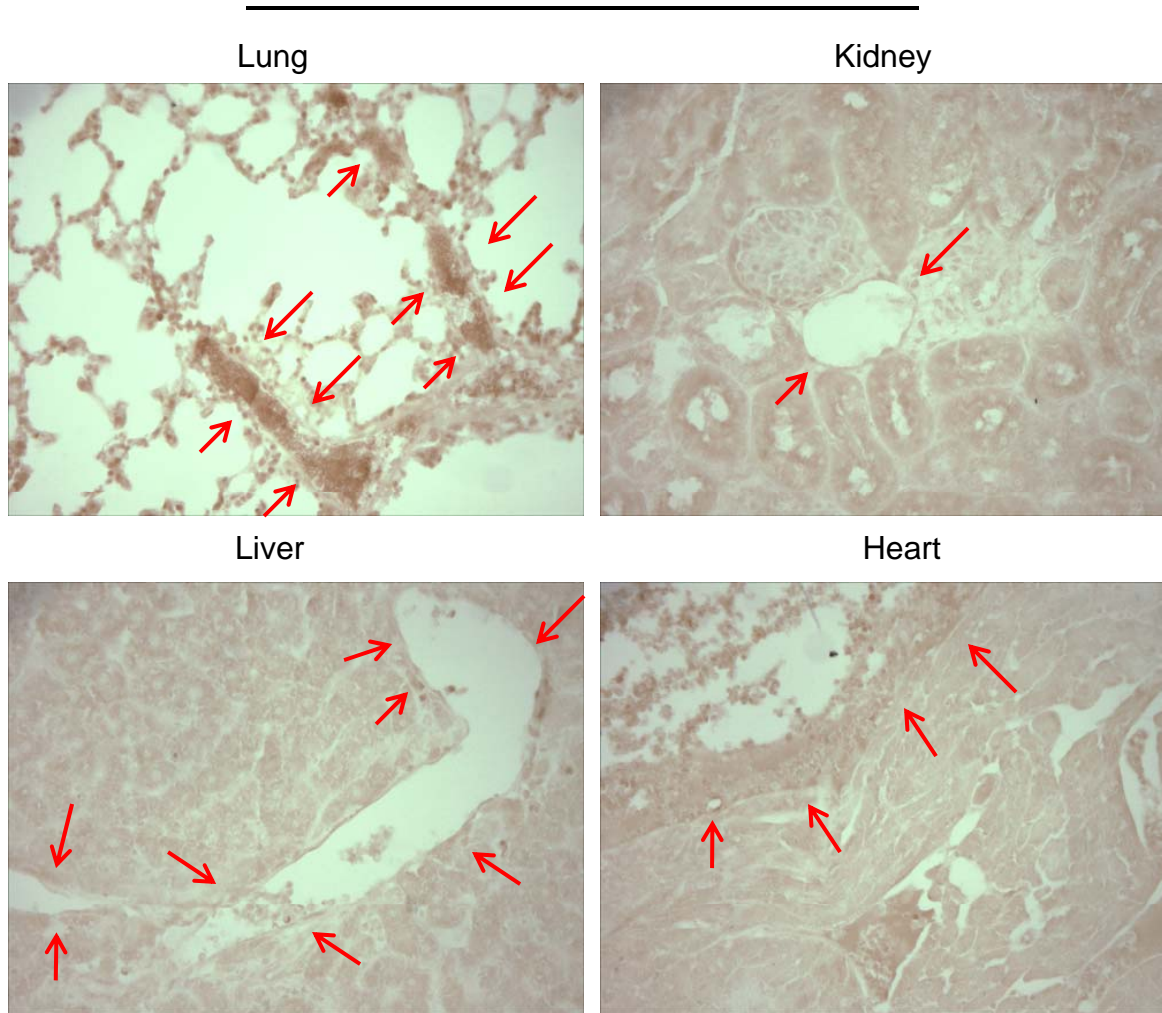

**FigS4. Thrombi were specifically formed in the lung, but not in the kidney, liver and heart of *ThCD59<sup>RBC</sup>* mice treated with ILY<sub>140</sub>FI.** Representative images (magnification: X 40) show Intergrin  $\alpha$ IIb stainings in the blood vasculature of lung, kidney, liver and heart of *ThCD59<sup>RBC</sup>* mice treated with ILY<sub>140</sub>FI. There were extensive Intergrin  $\alpha$ IIb stainings in the thrombi of the blood vessels in the lungs but not the kidney, liver and heart of the mice. Arrows point to vasculatures in the tissues.

FigS5

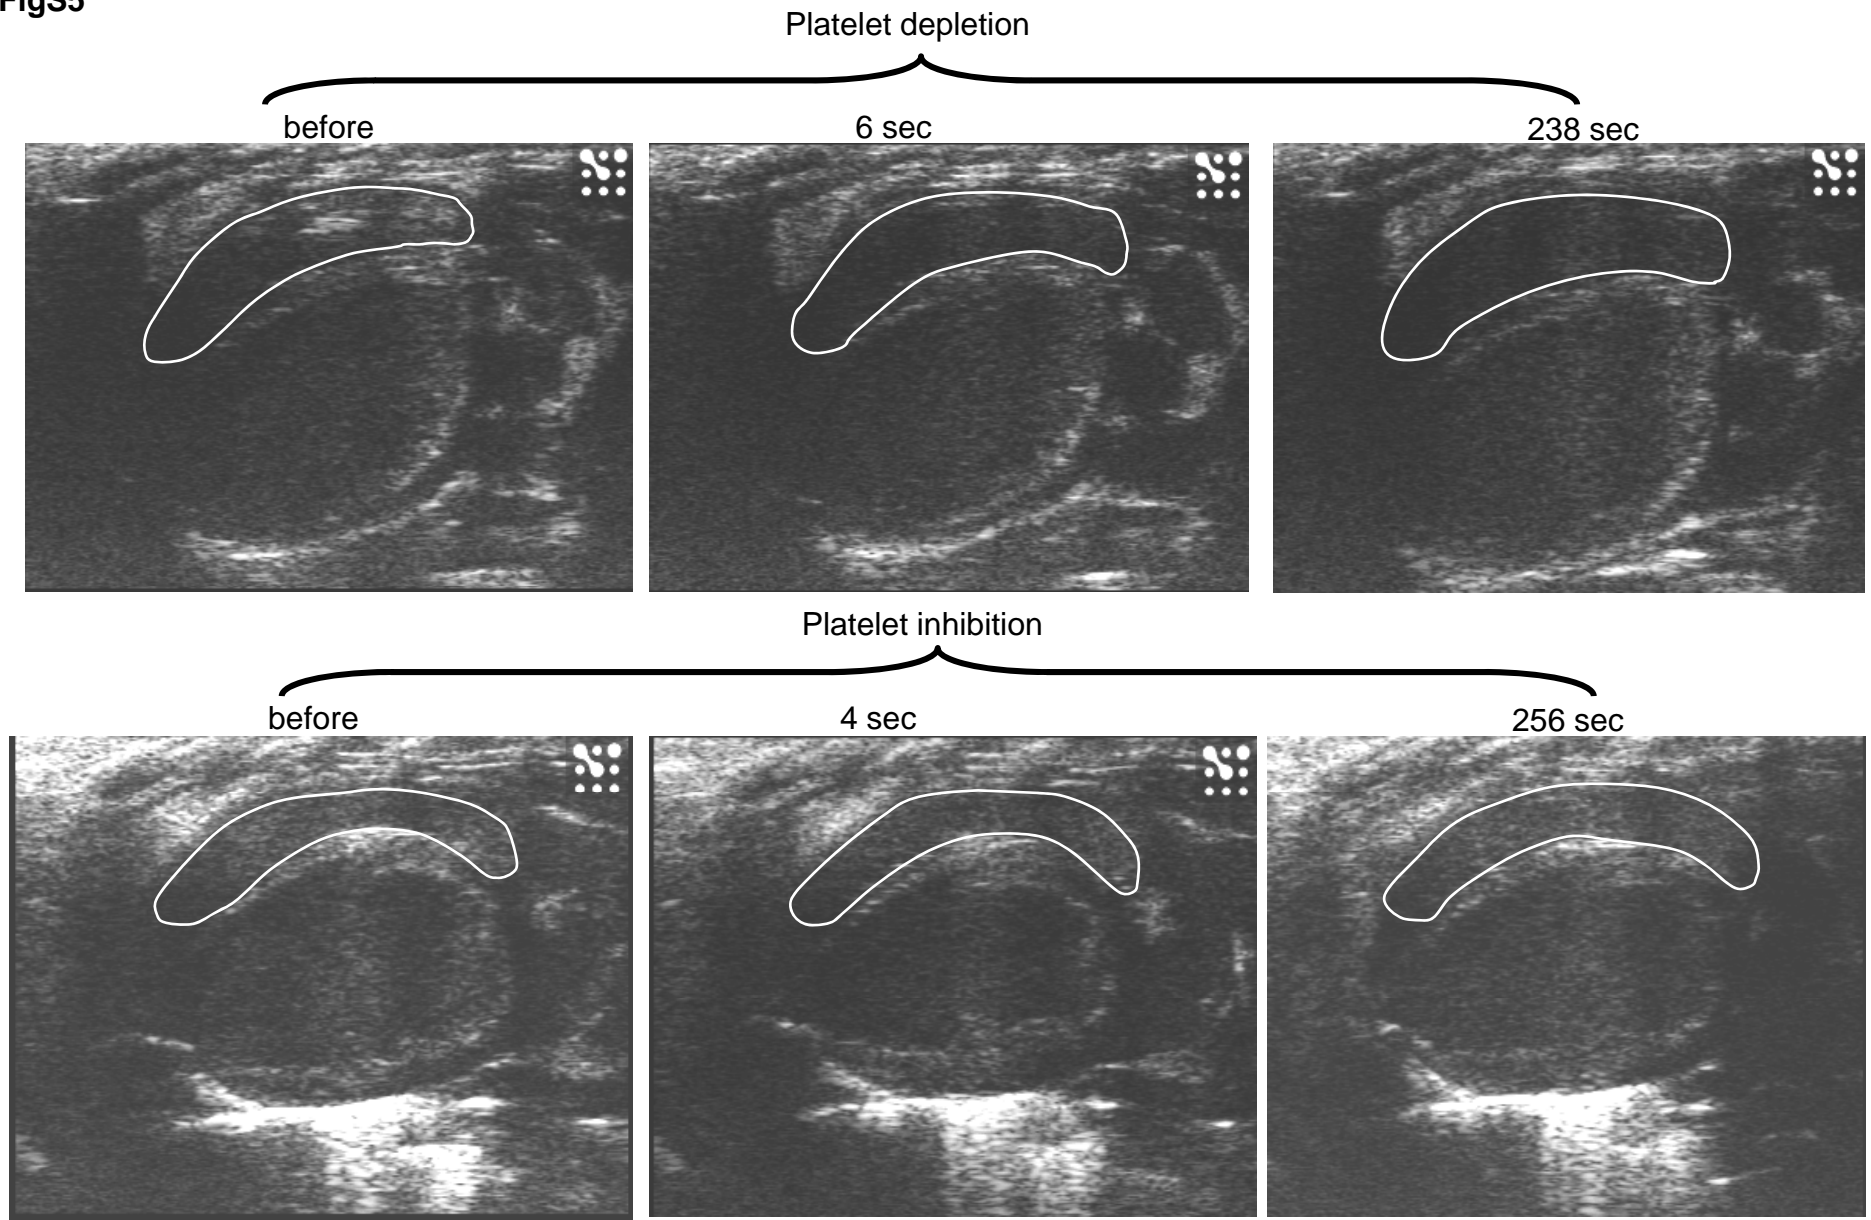

**FigS5:** Representative echocardiographic frames show the dynamic changes in the right ventricular volume in the *ThCD59<sup>RBC</sup>* with platelet depletion (neuraminidase treatment) and inhibition (clopidogrel treatment) followed by ILY<sub>140</sub>FI injection (the videos are shown in **Supplementary movies 4-6**).

FigS6

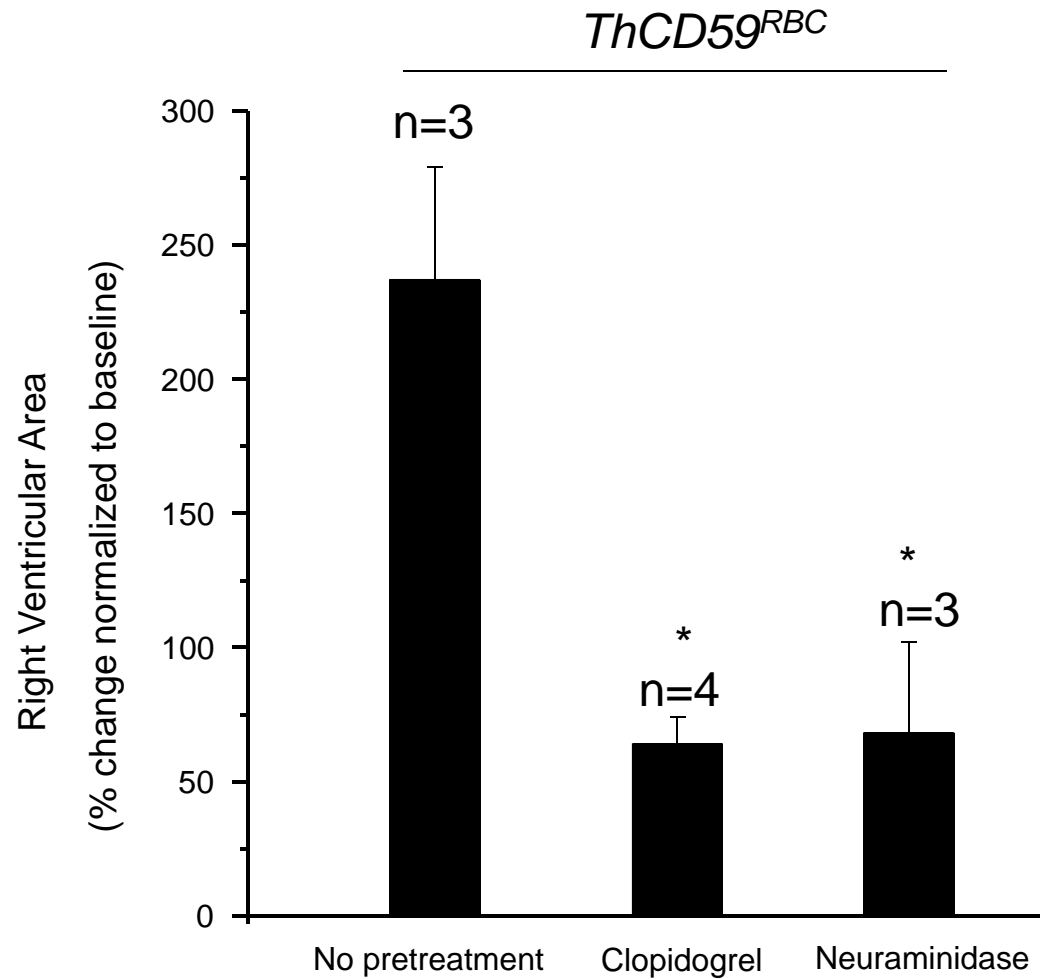

**FigS6:** Increased percentage of maximal right ventricular area (at end-diastole) vs. baseline right ventricular area in the *ThCD59<sup>RBC</sup>* mice treated with clopidogrel and neuraminidase followed by ILY<sub>140</sub>FI. \*  $P < 0.01$  vs. the mice without the pretreatment. The data are shown as mean  $\pm$  SEM

FigS7

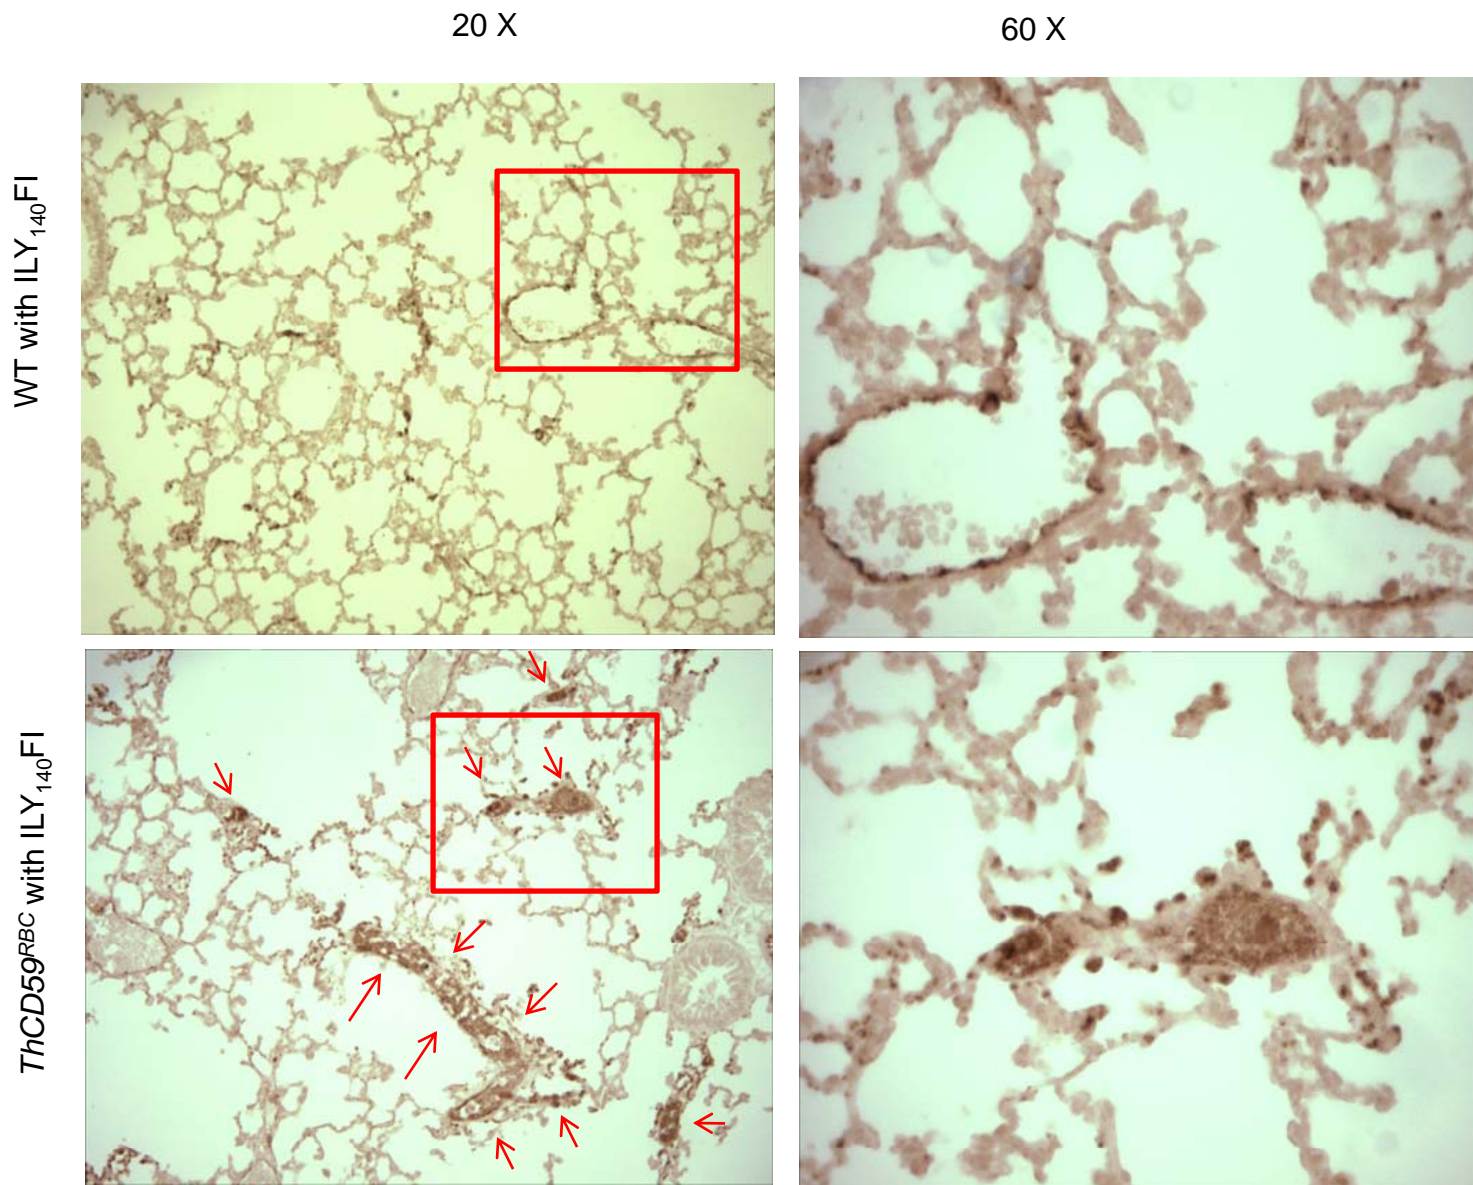

**FigS7. Representative images of vWF staining in lung.** There were more extensive vWF stainings (arrows) in the thrombi of the blood vessels in the lungs of *ThCD59<sup>RBC</sup>* mice but not WT treated with ILY<sub>140</sub>FI.
